# Supplementary material
Source: publisher figshare collection journal article supplement (https://rs.figshare.com/ndownloader/files/16209980)
Supplement: Supplementary file 1 [file 16209980]

## Sheet: Sheet2
transformed.bearing.difference	sex	distance.camp.test	distance.test.target	age	sun	onofftrail	testID	subjectID	dayID	targetID	test.locationID
0.00633421	f	0	275.069	27	sun	ontrail	alle_3165	alle	3165	camp_ours	camp
0.0285214	f	0	3864.06	27	sun	ontrail	alle_3165	alle	3165	djoube	camp
0.0174278	f	0	2345.56	27	sun	ontrail	alle_3165	alle	3165	monsanda	camp
0.0340682	f	0	5077.56	27	sun	ontrail	alle_3165	alle	3165	ndongo	camp
0.0507087	f	0	9466.66	27	sun	ontrail	alle_3165	alle	3165	bimbamboko	camp
0.000787402	f	0	1629.03	27	sun	ontrail	alle_3165	alle	3165	bauler	camp
0.00633421	f	0	275.069	33	sun	ontrail	apel_3165	apel	3165	camp_ours	camp
0.000787402	f	0	3864.06	33	sun	ontrail	apel_3165	apel	3165	djoube	camp
0.488906	f	0	15794.9	33	sun	ontrail	apel_3165	apel	3165	banguimotaba	camp
0.0174278	f	0	2345.56	33	sun	ontrail	apel_3165	apel	3165	monsanda	camp
0.0895363	f	0	5077.56	33	sun	ontrail	apel_3165	apel	3165	ndongo	camp
0.0507087	f	0	9466.66	33	sun	ontrail	apel_3165	apel	3165	bimbamboko	camp
0.000787402	f	0	1629.03	33	sun	ontrail	apel_3165	apel	3165	bauler	camp
0.00633421	f	0	275.069	61	sun	ontrail	bake_3165	bake	3165	camp_ours	camp
0.000787402	f	0	3864.06	61	sun	ontrail	bake_3165	bake	3165	djoube	camp
0.0174278	f	0	2345.56	61	sun	ontrail	bake_3165	bake	3165	monsanda	camp
0.0895363	f	0	5077.56	61	sun	ontrail	bake_3165	bake	3165	ndongo	camp
0.0507087	f	0	9466.66	61	sun	ontrail	bake_3165	bake	3165	bimbamboko	camp
0.000787402	f	0	1629.03	61	sun	ontrail	bake_3165	bake	3165	bauler	camp
0.00633421	m	0	275.069	42	sun	ontrail	bene_3165	bene	3165	camp_ours	camp
0.000787402	m	0	3864.06	42	sun	ontrail	bene_3165	bene	3165	djoube	camp
0.0451619	m	0	15794.9	42	sun	ontrail	bene_3165	bene	3165	banguimotaba	camp
0.0728959	m	0	2345.56	42	sun	ontrail	bene_3165	bene	3165	monsanda	camp
0.0340682	m	0	5077.56	42	sun	ontrail	bene_3165	bene	3165	ndongo	camp
0.00633421	m	0	9466.66	42	sun	ontrail	bene_3165	bene	3165	bimbamboko	camp
0.111724	m	0	1629.03	42	sun	ontrail	bene_3165	bene	3165	bauler	camp
0.00633421	m	0	275.069	65	sun	ontrail	bobi_3165	bobi	3165	camp_ours	camp
0.0285214	m	0	3864.06	65	sun	ontrail	bobi_3165	bobi	3165	djoube	camp
0.156098	m	0	15794.9	65	sun	ontrail	bobi_3165	bobi	3165	banguimotaba	camp
0.0174278	m	0	2345.56	65	sun	ontrail	bobi_3165	bobi	3165	monsanda	camp
0.0229746	m	0	5077.56	65	sun	ontrail	bobi_3165	bobi	3165	ndongo	camp
0.00633421	m	0	9466.66	65	sun	ontrail	bobi_3165	bobi	3165	bimbamboko	camp
0.111724	m	0	1629.03	65	sun	ontrail	bobi_3165	bobi	3165	bauler	camp
0.00633421	m	0	275.069	71	sun	ontrail	boke_3165	boke	3165	camp_ours	camp
0.0285214	m	0	3864.06	71	sun	ontrail	boke_3165	boke	3165	djoube	camp
0.267034	m	0	15794.9	71	sun	ontrail	boke_3165	boke	3165	banguimotaba	camp
0.0174278	m	0	2345.56	71	sun	ontrail	boke_3165	boke	3165	monsanda	camp
0.0174278	m	0	5077.56	71	sun	ontrail	boke_3165	boke	3165	ndongo	camp
0.00633421	m	0	9466.66	71	sun	ontrail	boke_3165	boke	3165	bimbamboko	camp
0.000787402	m	0	1629.03	71	sun	ontrail	boke_3165	boke	3165	bauler	camp
0.00633421	m	0	275.069	56	sun	ontrail	boku_3165	boku	3165	camp_ours	camp
0.0285214	m	0	3864.06	56	sun	ontrail	boku_3165	boku	3165	djoube	camp
0.0451619	m	0	15794.9	56	sun	ontrail	boku_3165	boku	3165	banguimotaba	camp
0.0174278	m	0	2345.56	56	sun	ontrail	boku_3165	boku	3165	monsanda	camp
0.00633421	m	0	5077.56	56	sun	ontrail	boku_3165	boku	3165	ndongo	camp
0.00633421	m	0	9466.66	56	sun	ontrail	boku_3165	boku	3165	bimbamboko	camp
0.278128	m	0	1629.03	56	sun	ontrail	boku_3165	boku	3165	bauler	camp
0.00633421	f	0	275.069	37	sun	ontrail	bote_3165	bote	3165	camp_ours	camp
0.000787402	f	0	3864.06	37	sun	ontrail	bote_3165	bote	3165	djoube	camp
0.37797	f	0	15794.9	37	sun	ontrail	bote_3165	bote	3165	banguimotaba	camp
0.0174278	f	0	2345.56	37	sun	ontrail	bote_3165	bote	3165	monsanda	camp
0.0340682	f	0	5077.56	37	sun	ontrail	bote_3165	bote	3165	ndongo	camp
0.0507087	f	0	9466.66	37	sun	ontrail	bote_3165	bote	3165	bimbamboko	camp
0.000787402	f	0	1629.03	37	sun	ontrail	bote_3165	bote	3165	bauler	camp
0.00633421	f	0	275.069	69	sun	ontrail	buma_3165	buma	3165	camp_ours	camp
0.000787402	f	0	3864.06	69	sun	ontrail	buma_3165	buma	3165	djoube	camp
0.211566	f	0	15794.9	69	sun	ontrail	buma_3165	buma	3165	banguimotaba	camp
0.039615	f	0	2345.56	69	sun	ontrail	buma_3165	buma	3165	monsanda	camp
0.0340682	f	0	5077.56	69	sun	ontrail	buma_3165	buma	3165	ndongo	camp
0.0507087	f	0	9466.66	69	sun	ontrail	buma_3165	buma	3165	bimbamboko	camp
0.000787402	f	0	1629.03	69	sun	ontrail	buma_3165	buma	3165	bauler	camp
0.00633421	m	0	275.069	67	sun	ontrail	bumb_3165	bumb	3165	camp_ours	camp
0.000787402	m	0	3864.06	67	sun	ontrail	bumb_3165	bumb	3165	djoube	camp
0.322502	m	0	15794.9	67	sun	ontrail	bumb_3165	bumb	3165	banguimotaba	camp
0.0174278	m	0	2345.56	67	sun	ontrail	bumb_3165	bumb	3165	monsanda	camp
0.0340682	m	0	5077.56	67	sun	ontrail	bumb_3165	bumb	3165	ndongo	camp
0.106177	m	0	9466.66	67	sun	ontrail	bumb_3165	bumb	3165	bimbamboko	camp
0.000787402	m	0	1629.03	67	sun	ontrail	bumb_3165	bumb	3165	bauler	camp
0.00633421	m	0	275.069	15.5	sun	ontrail	djou_3165	djou	3165	camp_ours	camp
0.000787402	m	0	3864.06	15.5	sun	ontrail	djou_3165	djou	3165	djoube	camp
0.156098	m	0	15794.9	15.5	sun	ontrail	djou_3165	djou	3165	banguimotaba	camp
0.0174278	m	0	2345.56	15.5	sun	ontrail	djou_3165	djou	3165	monsanda	camp
0.00633421	m	0	5077.56	15.5	sun	ontrail	djou_3165	djou	3165	ndongo	camp
0.00633421	m	0	9466.66	15.5	sun	ontrail	djou_3165	djou	3165	bimbamboko	camp
0.000787402	m	0	1629.03	15.5	sun	ontrail	djou_3165	djou	3165	bauler	camp
0.00633421	f	0	275.069	18	sun	ontrail	dolo_3165	dolo	3165	camp_ours	camp
0.000787402	f	0	3864.06	18	sun	ontrail	dolo_3165	dolo	3165	djoube	camp
0.10063	f	0	15794.9	18	sun	ontrail	dolo_3165	dolo	3165	banguimotaba	camp
0.0174278	f	0	2345.56	18	sun	ontrail	dolo_3165	dolo	3165	monsanda	camp
0.0340682	f	0	5077.56	18	sun	ontrail	dolo_3165	dolo	3165	ndongo	camp
0.00633421	f	0	9466.66	18	sun	ontrail	dolo_3165	dolo	3165	bimbamboko	camp
0.000787402	f	0	1629.03	18	sun	ontrail	dolo_3165	dolo	3165	bauler	camp
0.00633421	f	0	275.069	15	sun	ontrail	dumb_3165	dumb	3165	camp_ours	camp
0.000787402	f	0	3864.06	15	sun	ontrail	dumb_3165	dumb	3165	djoube	camp
0.0174278	f	0	2345.56	15	sun	ontrail	dumb_3165	dumb	3165	monsanda	camp
0.00633421	f	0	5077.56	15	sun	ontrail	dumb_3165	dumb	3165	ndongo	camp
0.0229746	f	0	9466.66	15	sun	ontrail	dumb_3165	dumb	3165	bimbamboko	camp
0.000787402	f	0	1629.03	15	sun	ontrail	dumb_3165	dumb	3165	bauler	camp
0.00633421	f	0	275.069	15.5	sun	ontrail	emil_3165	emil	3165	camp_ours	camp
0.000787402	f	0	3864.06	15.5	sun	ontrail	emil_3165	emil	3165	djoube	camp
0.0174278	f	0	2345.56	15.5	sun	ontrail	emil_3165	emil	3165	monsanda	camp
0.0340682	f	0	5077.56	15.5	sun	ontrail	emil_3165	emil	3165	ndongo	camp
0.00633421	f	0	9466.66	15.5	sun	ontrail	emil_3165	emil	3165	bimbamboko	camp
0.000787402	f	0	1629.03	15.5	sun	ontrail	emil_3165	emil	3165	bauler	camp
0.0340682	f	0	275.069	14	sun	ontrail	hana_3165	hana	3165	camp_ours	camp
0.0839895	f	0	3864.06	14	sun	ontrail	hana_3165	hana	3165	djoube	camp
0.156098	f	0	15794.9	14	sun	ontrail	hana_3165	hana	3165	banguimotaba	camp
0.183832	f	0	2345.56	14	sun	ontrail	hana_3165	hana	3165	monsanda	camp
0.11727	f	0	5077.56	14	sun	ontrail	hana_3165	hana	3165	ndongo	camp
0.00633421	f	0	9466.66	14	sun	ontrail	hana_3165	hana	3165	bimbamboko	camp
0.000787402	f	0	1629.03	14	sun	ontrail	hana_3165	hana	3165	bauler	camp
0.0784427	f	0	275.069	16.7	sun	ontrail	ingo_3165	ingo	3165	camp_ours	camp
0.000787402	f	0	3864.06	16.7	sun	ontrail	ingo_3165	ingo	3165	djoube	camp
0.128364	f	0	2345.56	16.7	sun	ontrail	ingo_3165	ingo	3165	monsanda	camp
0.0895363	f	0	5077.56	16.7	sun	ontrail	ingo_3165	ingo	3165	ndongo	camp
0.00633421	f	0	9466.66	16.7	sun	ontrail	ingo_3165	ingo	3165	bimbamboko	camp
0.0562555	f	0	1629.03	16.7	sun	ontrail	ingo_3165	ingo	3165	bauler	camp
0.0229746	f	0	275.069	58	sun	ontrail	jama_3165	jama	3165	camp_ours	camp
0.000787402	f	0	3864.06	58	sun	ontrail	jama_3165	jama	3165	djoube	camp
0.211566	f	0	15794.9	58	sun	ontrail	jama_3165	jama	3165	banguimotaba	camp
0.0174278	f	0	2345.56	58	sun	ontrail	jama_3165	jama	3165	monsanda	camp
0.0340682	f	0	5077.56	58	sun	ontrail	jama_3165	jama	3165	ndongo	camp
0.00633421	f	0	9466.66	58	sun	ontrail	jama_3165	jama	3165	bimbamboko	camp
0.000787402	f	0	1629.03	58	sun	ontrail	jama_3165	jama	3165	bauler	camp
0.00633421	m	0	275.069	17	sun	ontrail	jamb_3165	jamb	3165	camp_ours	camp
0.000787402	m	0	3864.06	17	sun	ontrail	jamb_3165	jamb	3165	djoube	camp
0.0451619	m	0	15794.9	17	sun	ontrail	jamb_3165	jamb	3165	banguimotaba	camp
0.000787402	m	0	2345.56	17	sun	ontrail	jamb_3165	jamb	3165	monsanda	camp
0.00633421	m	0	5077.56	17	sun	ontrail	jamb_3165	jamb	3165	ndongo	camp
0.00633421	m	0	9466.66	17	sun	ontrail	jamb_3165	jamb	3165	bimbamboko	camp
0.0562555	m	0	1629.03	17	sun	ontrail	jamb_3165	jamb	3165	bauler	camp
0.00633421	m	0	275.069	28	sun	ontrail	jiji_3165	jiji	3165	camp_ours	camp
0.0285214	m	0	3864.06	28	sun	ontrail	jiji_3165	jiji	3165	djoube	camp
0.0174278	m	0	2345.56	28	sun	ontrail	jiji_3165	jiji	3165	monsanda	camp
0.00633421	m	0	5077.56	28	sun	ontrail	jiji_3165	jiji	3165	ndongo	camp
0.00633421	m	0	9466.66	28	sun	ontrail	jiji_3165	jiji	3165	bimbamboko	camp
0.000787402	m	0	1629.03	28	sun	ontrail	jiji_3165	jiji	3165	bauler	camp
0.00633421	m	0	275.069	24	sun	ontrail	jino_3165	jino	3165	camp_ours	camp
0.000787402	m	0	3864.06	24	sun	ontrail	jino_3165	jino	3165	djoube	camp
0.10063	m	0	15794.9	24	sun	ontrail	jino_3165	jino	3165	banguimotaba	camp
0.0174278	m	0	2345.56	24	sun	ontrail	jino_3165	jino	3165	monsanda	camp
0.00633421	m	0	5077.56	24	sun	ontrail	jino_3165	jino	3165	ndongo	camp
0.00633421	m	0	9466.66	24	sun	ontrail	jino_3165	jino	3165	bimbamboko	camp
0.000787402	m	0	1629.03	24	sun	ontrail	jino_3165	jino	3165	bauler	camp
0.00633421	m	0	275.069	25	sun	ontrail	kumk_3165	kumk	3165	camp_ours	camp
0.0285214	m	0	3864.06	25	sun	ontrail	kumk_3165	kumk	3165	djoube	camp
0.10063	m	0	15794.9	25	sun	ontrail	kumk_3165	kumk	3165	banguimotaba	camp
0.0174278	m	0	2345.56	25	sun	ontrail	kumk_3165	kumk	3165	monsanda	camp
0.00633421	m	0	5077.56	25	sun	ontrail	kumk_3165	kumk	3165	ndongo	camp
0.00633421	m	0	9466.66	25	sun	ontrail	kumk_3165	kumk	3165	bimbamboko	camp
0.000787402	m	0	1629.03	25	sun	ontrail	kumk_3165	kumk	3165	bauler	camp
0.00633421	m	0	275.069	35	sun	ontrail	lune_3165	lune	3165	camp_ours	camp
0.000787402	m	0	3864.06	35	sun	ontrail	lune_3165	lune	3165	djoube	camp
0.156098	m	0	15794.9	35	sun	ontrail	lune_3165	lune	3165	banguimotaba	camp
0.0174278	m	0	2345.56	35	sun	ontrail	lune_3165	lune	3165	monsanda	camp
0.00633421	m	0	5077.56	35	sun	ontrail	lune_3165	lune	3165	ndongo	camp
0.0229746	m	0	9466.66	35	sun	ontrail	lune_3165	lune	3165	bimbamboko	camp
0.000787402	m	0	1629.03	35	sun	ontrail	lune_3165	lune	3165	bauler	camp
0.00633421	f	0	275.069	25.5	sun	ontrail	maba_3165	maba	3165	camp_ours	camp
0.000787402	f	0	3864.06	25.5	sun	ontrail	maba_3165	maba	3165	djoube	camp
0.0174278	f	0	2345.56	25.5	sun	ontrail	maba_3165	maba	3165	monsanda	camp
0.0340682	f	0	5077.56	25.5	sun	ontrail	maba_3165	maba	3165	ndongo	camp
0.00633421	f	0	9466.66	25.5	sun	ontrail	maba_3165	maba	3165	bimbamboko	camp
0.000787402	f	0	1629.03	25.5	sun	ontrail	maba_3165	maba	3165	bauler	camp
0.00633421	f	0	275.069	14.5	sun	ontrail	mado_3165	mado	3165	camp_ours	camp
0.000787402	f	0	3864.06	14.5	sun	ontrail	mado_3165	mado	3165	djoube	camp
0.0451619	f	0	15794.9	14.5	sun	ontrail	mado_3165	mado	3165	banguimotaba	camp
0.0174278	f	0	2345.56	14.5	sun	ontrail	mado_3165	mado	3165	monsanda	camp
0.00633421	f	0	5077.56	14.5	sun	ontrail	mado_3165	mado	3165	ndongo	camp
0.00633421	f	0	9466.66	14.5	sun	ontrail	mado_3165	mado	3165	bimbamboko	camp
0.000787402	f	0	1629.03	14.5	sun	ontrail	mado_3165	mado	3165	bauler	camp
0.0784427	m	0	275.069	26	sun	ontrail	mise_3165	mise	3165	camp_ours	camp
0.0285214	m	0	3864.06	26	sun	ontrail	mise_3165	mise	3165	djoube	camp
0.0451619	m	0	15794.9	26	sun	ontrail	mise_3165	mise	3165	banguimotaba	camp
0.128364	m	0	2345.56	26	sun	ontrail	mise_3165	mise	3165	monsanda	camp
0.0340682	m	0	5077.56	26	sun	ontrail	mise_3165	mise	3165	ndongo	camp
0.0507087	m	0	9466.66	26	sun	ontrail	mise_3165	mise	3165	bimbamboko	camp
0.000787402	m	0	1629.03	26	sun	ontrail	mise_3165	mise	3165	bauler	camp
0.00633421	f	0	275.069	41	sun	ontrail	mosa_3165	mosa	3165	camp_ours	camp
0.000787402	f	0	3864.06	41	sun	ontrail	mosa_3165	mosa	3165	djoube	camp
0.37797	f	0	15794.9	41	sun	ontrail	mosa_3165	mosa	3165	banguimotaba	camp
0.0174278	f	0	2345.56	41	sun	ontrail	mosa_3165	mosa	3165	monsanda	camp
0.00633421	f	0	5077.56	41	sun	ontrail	mosa_3165	mosa	3165	ndongo	camp
0.00633421	f	0	9466.66	41	sun	ontrail	mosa_3165	mosa	3165	bimbamboko	camp
0.000787402	f	0	1629.03	41	sun	ontrail	mosa_3165	mosa	3165	bauler	camp
0.00633421	f	0	275.069	23	sun	ontrail	ndon_3165	ndon	3165	camp_ours	camp
0.000787402	f	0	3864.06	23	sun	ontrail	ndon_3165	ndon	3165	djoube	camp
0.0174278	f	0	2345.56	23	sun	ontrail	ndon_3165	ndon	3165	monsanda	camp
0.00633421	f	0	5077.56	23	sun	ontrail	ndon_3165	ndon	3165	ndongo	camp
0.00633421	f	0	9466.66	23	sun	ontrail	ndon_3165	ndon	3165	bimbamboko	camp
0.000787402	f	0	1629.03	23	sun	ontrail	ndon_3165	ndon	3165	bauler	camp
0.00633421	f	0	275.069	76	sun	ontrail	niel_3165	niel	3165	camp_ours	camp
0.000787402	f	0	3864.06	76	sun	ontrail	niel_3165	niel	3165	djoube	camp
0.156098	f	0	15794.9	76	sun	ontrail	niel_3165	niel	3165	banguimotaba	camp
0.0174278	f	0	2345.56	76	sun	ontrail	niel_3165	niel	3165	monsanda	camp
0.0340682	f	0	5077.56	76	sun	ontrail	niel_3165	niel	3165	ndongo	camp
0.00633421	f	0	9466.66	76	sun	ontrail	niel_3165	niel	3165	bimbamboko	camp
0.000787402	f	0	1629.03	76	sun	ontrail	niel_3165	niel	3165	bauler	camp
0.00633421	f	0	275.069	26.5	sun	ontrail	niey_3165	niey	3165	camp_ours	camp
0.0285214	f	0	3864.06	26.5	sun	ontrail	niey_3165	niey	3165	djoube	camp
0.211566	f	0	15794.9	26.5	sun	ontrail	niey_3165	niey	3165	banguimotaba	camp
0.2393	f	0	2345.56	26.5	sun	ontrail	niey_3165	niey	3165	monsanda	camp
0.0340682	f	0	5077.56	26.5	sun	ontrail	niey_3165	niey	3165	ndongo	camp
0.0229746	f	0	9466.66	26.5	sun	ontrail	niey_3165	niey	3165	bimbamboko	camp
0.0562555	f	0	1629.03	26.5	sun	ontrail	niey_3165	niey	3165	bauler	camp
0.000787402	f	0	275.069	25.5	sun	ontrail	pusa_3165	pusa	3165	camp_ours	camp
0.000787402	f	0	3864.06	25.5	sun	ontrail	pusa_3165	pusa	3165	djoube	camp
0.0174278	f	0	2345.56	25.5	sun	ontrail	pusa_3165	pusa	3165	monsanda	camp
0.0340682	f	0	5077.56	25.5	sun	ontrail	pusa_3165	pusa	3165	ndongo	camp
0.0507087	f	0	9466.66	25.5	sun	ontrail	pusa_3165	pusa	3165	bimbamboko	camp
0.000787402	f	0	1629.03	25.5	sun	ontrail	pusa_3165	pusa	3165	bauler	camp
0.00633421	m	0	275.069	46	sun	ontrail	simo_3165	simo	3165	camp_ours	camp
0.000787402	m	0	3864.06	46	sun	ontrail	simo_3165	simo	3165	djoube	camp
0.211566	m	0	15794.9	46	sun	ontrail	simo_3165	simo	3165	banguimotaba	camp
0.011881	m	0	2345.56	46	sun	ontrail	simo_3165	simo	3165	monsanda	camp
0.00633421	m	0	5077.56	46	sun	ontrail	simo_3165	simo	3165	ndongo	camp
0.00633421	m	0	9466.66	46	sun	ontrail	simo_3165	simo	3165	bimbamboko	camp
0.000787402	m	0	1629.03	46	sun	ontrail	simo_3165	simo	3165	bauler	camp
0.0229746	f	0	275.069	22	sun	ontrail	song_3165	song	3165	camp_ours	camp
0.0285214	f	0	3864.06	22	sun	ontrail	song_3165	song	3165	djoube	camp
0.156098	f	0	15794.9	22	sun	ontrail	song_3165	song	3165	banguimotaba	camp
0.0174278	f	0	2345.56	22	sun	ontrail	song_3165	song	3165	monsanda	camp
0.00633421	f	0	5077.56	22	sun	ontrail	song_3165	song	3165	ndongo	camp
0.00633421	f	0	9466.66	22	sun	ontrail	song_3165	song	3165	bimbamboko	camp
0.000787402	f	0	1629.03	22	sun	ontrail	song_3165	song	3165	bauler	camp
0.00633421	f	0	275.069	43	sun	ontrail	sopo_3165	sopo	3165	camp_ours	camp
0.0285214	f	0	3864.06	43	sun	ontrail	sopo_3165	sopo	3165	djoube	camp
0.0451619	f	0	15794.9	43	sun	ontrail	sopo_3165	sopo	3165	banguimotaba	camp
0.0174278	f	0	2345.56	43	sun	ontrail	sopo_3165	sopo	3165	monsanda	camp
0.0340682	f	0	5077.56	43	sun	ontrail	sopo_3165	sopo	3165	ndongo	camp
0.00633421	f	0	9466.66	43	sun	ontrail	sopo_3165	sopo	3165	bimbamboko	camp
0.0285214	f	0	1629.03	43	sun	ontrail	sopo_3165	sopo	3165	bauler	camp
0.0285214	f	0.0480135	4158.33	27	nosun	ontrail	alle_3079	alle	3079	djoube	camp
0.0340682	f	0.0480135	2596.3	27	nosun	ontrail	alle_3079	alle	3079	monsanda	camp
0.0451619	f	0.0480135	4860.92	27	nosun	ontrail	alle_3079	alle	3079	ndongo	camp
0.0562555	f	0.0480135	9227.44	27	nosun	ontrail	alle_3079	alle	3079	bimbamboko	camp
0.00633421	f	0.0480135	1922.73	27	nosun	ontrail	alle_3079	alle	3079	bauler	camp
0.039615	f	0.0480135	1380.08	27	nosun	ontrail	alle_3079	alle	3079	P32GEMB	camp
0.133911	f	0.0480135	2608.09	27	nosun	ontrail	alle_3079	alle	3079	P08PUSA	camp
0.0285214	f	0.0480135	4158.33	33	nosun	ontrail	apel_3079	apel	3079	djoube	camp
0.0340682	f	0.0480135	2596.3	33	nosun	ontrail	apel_3079	apel	3079	monsanda	camp
0.011881	f	0.0480135	4860.92	33	nosun	ontrail	apel_3079	apel	3079	ndongo	camp
0.000787402	f	0.0480135	9227.44	33	nosun	ontrail	apel_3079	apel	3079	bimbamboko	camp
0.00633421	f	0.0480135	1922.73	33	nosun	ontrail	apel_3079	apel	3079	bauler	camp
0.0174278	f	0.0480135	1380.08	33	nosun	ontrail	apel_3079	apel	3079	P32GEMB	camp
0.0895363	f	0.0480135	2608.09	33	nosun	ontrail	apel_3079	apel	3079	P08PUSA	camp
0.0285214	f	0.0480135	4158.33	37	nosun	ontrail	bote_3079	bote	3079	djoube	camp
0.0340682	f	0.0480135	2596.3	37	nosun	ontrail	bote_3079	bote	3079	monsanda	camp
0.0451619	f	0.0480135	4860.92	37	nosun	ontrail	bote_3079	bote	3079	ndongo	camp
0.0562555	f	0.0480135	9227.44	37	nosun	ontrail	bote_3079	bote	3079	bimbamboko	camp
0.00633421	f	0.0480135	1922.73	37	nosun	ontrail	bote_3079	bote	3079	bauler	camp
0.039615	f	0.0480135	1380.08	37	nosun	ontrail	bote_3079	bote	3079	P32GEMB	camp
0.0229746	f	0.0480135	2608.09	37	nosun	ontrail	bote_3079	bote	3079	P08PUSA	camp
0.0285214	f	0.0480135	4158.33	15.5	nosun	ontrail	emil_3079	emil	3079	djoube	camp
0.0340682	f	0.0480135	2596.3	15.5	nosun	ontrail	emil_3079	emil	3079	monsanda	camp
0.011881	f	0.0480135	4860.92	15.5	nosun	ontrail	emil_3079	emil	3079	ndongo	camp
0.000787402	f	0.0480135	9227.44	15.5	nosun	ontrail	emil_3079	emil	3079	bimbamboko	camp
0.106177	f	0.0480135	1922.73	15.5	nosun	ontrail	emil_3079	emil	3079	bauler	camp
0.206019	f	0.0480135	1380.08	15.5	nosun	ontrail	emil_3079	emil	3079	P32GEMB	camp
0.00633421	f	0.0480135	2608.09	15.5	nosun	ontrail	emil_3079	emil	3079	P08PUSA	camp
0.0285214	f	0.0480135	4158.33	16.7	nosun	ontrail	ingo_3079	ingo	3079	djoube	camp
0.0340682	f	0.0480135	2596.3	16.7	nosun	ontrail	ingo_3079	ingo	3079	monsanda	camp
0.0451619	f	0.0480135	4860.92	16.7	nosun	ontrail	ingo_3079	ingo	3079	ndongo	camp
0.0562555	f	0.0480135	9227.44	16.7	nosun	ontrail	ingo_3079	ingo	3079	bimbamboko	camp
0.0507087	f	0.0480135	1922.73	16.7	nosun	ontrail	ingo_3079	ingo	3079	bauler	camp
0.0950831	f	0.0480135	1380.08	16.7	nosun	ontrail	ingo_3079	ingo	3079	P32GEMB	camp
0.0340682	f	0.0480135	2608.09	16.7	nosun	ontrail	ingo_3079	ingo	3079	P08PUSA	camp
0.0285214	f	0.0480135	4158.33	28	nosun	ontrail	jaba_3079	jaba	3079	djoube	camp
0.0340682	f	0.0480135	2596.3	28	nosun	ontrail	jaba_3079	jaba	3079	monsanda	camp
0.011881	f	0.0480135	4860.92	28	nosun	ontrail	jaba_3079	jaba	3079	ndongo	camp
0.000787402	f	0.0480135	9227.44	28	nosun	ontrail	jaba_3079	jaba	3079	bimbamboko	camp
0.11727	f	0.0480135	1922.73	28	nosun	ontrail	jaba_3079	jaba	3079	bauler	camp
0.039615	f	0.0480135	1380.08	28	nosun	ontrail	jaba_3079	jaba	3079	P32GEMB	camp
0.0895363	f	0.0480135	2608.09	28	nosun	ontrail	jaba_3079	jaba	3079	P08PUSA	camp
0.0839895	f	39.579	4119.79	16.7	nosun	ontrail	mole_3059	mole	3059	djoube	loc1
0.150551	f	39.579	15596.3	16.7	nosun	ontrail	mole_3059	mole	3059	banguimotaba	loc1
0.039615	f	39.579	4883.03	16.7	nosun	ontrail	mole_3059	mole	3059	ndongo	loc1
0.0839895	f	39.579	2567.18	16.7	nosun	ontrail	mole_3059	mole	3059	monsanda	loc1
0.0562555	f	39.579	9253.64	16.7	nosun	ontrail	mole_3059	mole	3059	bimbamboko	loc1
0.111724	f	39.579	1883.71	16.7	nosun	ontrail	mole_3059	mole	3059	bauler	loc1
0.178091	m	158.374	158.374	8.5	nosun	ontrail	anic_3030	anic	3030	camp	loc2
0.141344	m	158.374	4315.46	8.5	nosun	ontrail	anic_3030	anic	3030	djoube	loc2
0.489985	m	158.374	4762.37	8.5	nosun	ontrail	anic_3030	anic	3030	ndongo	loc2
0.369948	m	178.076	178.076	8.5	nosun	ontrail	anic_3029	anic	3029	camp	loc3
0.24989	m	178.076	4308.12	8.5	nosun	ontrail	anic_3029	anic	3029	djoube	loc3
0.267405	m	178.076	4685.57	8.5	nosun	ontrail	anic_3029	anic	3029	ndongo	loc3
0.911192	f	183.115	183.115	6	nosun	ontrail	jako_3141	jako	3141	camp	loc4
0.0356245	f	183.115	3704.28	6	nosun	ontrail	jako_3141	jako	3141	djoube	loc4
0.834537	f	183.115	5144.31	6	nosun	ontrail	jako_3141	jako	3141	ndongo	loc4
0.0859409	f	193.843	3694.29	9	nosun	ontrail	jani_3120	jani	3120	djoube	loc5
0.518538	f	193.843	5149.69	9	nosun	ontrail	jani_3120	jani	3120	ndongo	loc5
0.598277	m	194.244	194.244	13.5	nosun	offtrail	kuon_3123	kuon	3123	camp	loc6
0.0812597	m	194.244	3694.41	13.5	nosun	offtrail	kuon_3123	kuon	3123	djoube	loc6
0.729764	m	194.244	5148.97	13.5	nosun	offtrail	kuon_3123	kuon	3123	ndongo	loc6
0.00568056	f	196.808	196.808	6.1	nosun	offtrail	keti_3060	keti	3060	camp	loc7
0.145145	f	196.808	4314.54	6.1	nosun	offtrail	keti_3060	keti	3060	djoube	loc7
0.381718	f	196.808	4664.87	6.1	nosun	offtrail	keti_3060	keti	3060	ndongo	loc7
0.646016	m	210.31	210.31	5.5	nosun	offtrail	itat_3153	itat	3153	camp	loc8
0.971962	m	210.31	5154.35	5.5	nosun	offtrail	itat_3153	itat	3153	ndongo	loc8
0.0319966	m	219.79	219.79	8.6	nosun	ontrail	luny_3052	luny	3052	camp	loc9
0.0438529	m	219.79	4377.49	8.6	nosun	ontrail	luny_3052	luny	3052	djoube	loc9
0.173873	m	219.79	4716.43	8.6	nosun	ontrail	luny_3052	luny	3052	ndongo	loc9
0.284854	m	250.108	250.108	11	sun	offtrail	alin_3160	alin	3160	camp	loc10
0.0211533	m	250.108	3673.54	11	sun	offtrail	alin_3160	alin	3160	djoube	loc10
0.459176	m	250.108	5126.17	11	sun	offtrail	alin_3160	alin	3160	ndongo	loc10
0.155837	f	289.645	289.645	14	nosun	offtrail	hana_3050	hana	3050	camp	loc11
0.216029	f	289.645	3955.07	14	nosun	offtrail	hana_3050	hana	3050	djoube	loc11
0.701318	f	289.645	4883.02	14	nosun	offtrail	hana_3050	hana	3050	ndongo	loc11
0.379012	f	296.016	296.016	6	nosun	offtrail	jako_3082	jako	3082	camp	loc12
0.083929	f	296.016	4392.18	6	nosun	offtrail	jako_3082	jako	3082	djoube	loc12
0.208236	f	296.016	4830.66	6	nosun	offtrail	jako_3082	jako	3082	ndongo	loc12
0.138511	m	375.561	375.561	10.7	nosun	ontrail	mbol_3016	mbol	3016	camp	loc13
0.087723	m	375.561	4435.62	10.7	nosun	ontrail	mbol_3016	mbol	3016	djoube	loc13
0.200798	m	375.561	4858.85	10.7	nosun	ontrail	mbol_3016	mbol	3016	ndongo	loc13
0.0319476	f	412.002	412.002	6.7	nosun	ontrail	mosy_3132	mosy	3132	camp	loc14
0.0186219	f	412.002	4275.91	6.7	nosun	ontrail	mosy_3132	mosy	3132	djoube	loc14
0.119594	f	412.002	4782.7	6.7	nosun	ontrail	mosy_3132	mosy	3132	ndongo	loc14
0.011881	m	415.87	412.691	56	nosun	offtrail	boku_2635	boku	2635	camp_ours	loc15
0.106177	m	415.87	4063.02	56	nosun	offtrail	boku_2635	boku	2635	djoube	loc15
0.122817	m	415.87	15898.8	56	nosun	offtrail	boku_2635	boku	2635	banguimotaba	loc15
0.775523	f	429.363	429.363	9	nosun	ontrail	jani_3120	jani	3120	camp	loc16
0.349882	f	429.363	3887.3	9	nosun	ontrail	jani_3120	jani	3120	djoube	loc16
0.852935	f	429.363	4807.18	9	nosun	ontrail	jani_3120	jani	3120	ndongo	loc16
0.152273	m	451.562	451.562	11.7	nosun	ontrail	didi_3134	didi	3134	camp	loc17
0.148272	m	451.562	3495.91	11.7	nosun	ontrail	didi_3134	didi	3134	djoube	loc17
0.936214	m	451.562	5217.11	11.7	nosun	ontrail	didi_3134	didi	3134	ndongo	loc17
0.681792	f	455.715	455.715	6.6	nosun	offtrail	kumu_3032	kumu	3032	camp	loc18
0.168547	f	455.715	3712	6.6	nosun	offtrail	kumu_3032	kumu	3032	djoube	loc18
0.608048	f	455.715	5140.12	6.6	nosun	offtrail	kumu_3032	kumu	3032	ndongo	loc18
0.698547	f	468.336	468.336	9	nosun	offtrail	jani_2999	jani	2999	camp	loc19
0.736059	f	468.336	3699.53	9	nosun	offtrail	jani_2999	jani	2999	djoube	loc19
0.874627	f	468.336	5148.72	9	nosun	offtrail	jani_2999	jani	2999	ndongo	loc19
0.662257	m	477.851	477.851	11.7	nosun	ontrail	didi_3048	didi	3048	camp	loc20
0.164216	m	477.851	3689.66	11.7	nosun	ontrail	didi_3048	didi	3048	djoube	loc20
0.750426	m	477.851	5156.89	11.7	nosun	ontrail	didi_3048	didi	3048	ndongo	loc20
0.680257	f	488.76	488.76	6.5	nosun	ontrail	gond_3070	gond	3070	camp	loc21
0.144537	f	488.76	3682.13	6.5	nosun	ontrail	gond_3070	gond	3070	djoube	loc21
0.916246	f	488.76	5153.15	6.5	nosun	ontrail	gond_3070	gond	3070	ndongo	loc21
0.998273	m	496.782	496.782	8	nosun	offtrail	yang_3089	yang	3089	camp	loc22
0.138466	m	496.782	3677.06	8	nosun	offtrail	yang_3089	yang	3089	djoube	loc22
0.868663	m	496.782	5149.73	8	nosun	offtrail	yang_3089	yang	3089	ndongo	loc22
0.847647	m	502.614	502.614	5.5	nosun	offtrail	itat_3085	itat	3085	camp	loc23
0.125839	m	502.614	3665.85	5.5	nosun	offtrail	itat_3085	itat	3085	djoube	loc23
0.806999	m	502.614	5171.5	5.5	nosun	offtrail	itat_3085	itat	3085	ndongo	loc23
0.149766	m	541.004	541.004	8	nosun	offtrail	yang_3158	yang	3158	camp	loc24
0.473005	m	541.004	4012.18	8	nosun	offtrail	yang_3158	yang	3158	djoube	loc24
0.838071	m	541.004	4656.43	8	nosun	offtrail	yang_3158	yang	3158	ndongo	loc24
0.657399	m	591.92	591.92	11.5	nosun	offtrail	bang_3148	bang	3148	camp	loc25
0.077143	m	591.92	3456.19	11.5	nosun	offtrail	bang_3148	bang	3148	djoube	loc25
0.541877	m	591.92	5171.2	11.5	nosun	offtrail	bang_3148	bang	3148	ndongo	loc25
0.817073	f	594.695	594.695	6	nosun	ontrail	jako_3141	jako	3141	camp	loc26
0.251494	f	594.695	4210.1	6	nosun	ontrail	jako_3141	jako	3141	djoube	loc26
0.977807	f	594.695	4511.92	6	nosun	ontrail	jako_3141	jako	3141	ndongo	loc26
0.972503	m	602.456	602.456	11.5	nosun	offtrail	bang_3148	bang	3148	camp	loc27
0.564897	m	602.456	4462.92	11.5	nosun	offtrail	bang_3148	bang	3148	djoube	loc27
0.0708296	m	602.456	4592.27	11.5	nosun	offtrail	bang_3148	bang	3148	ndongo	loc27
0.643061	f	648.321	648.321	12.7	nosun	ontrail	same_3026	same	3026	camp	loc28
0.712562	f	648.321	4001.34	12.7	nosun	ontrail	same_3026	same	3026	djoube	loc28
0.878072	f	648.321	4625.02	12.7	nosun	ontrail	same_3026	same	3026	ndongo	loc28
0.0355041	f	674.057	674.057	6.3	nosun	offtrail	mong_3068	mong	3068	camp	loc29
0.310592	f	674.057	3560.71	6.3	nosun	offtrail	mong_3068	mong	3068	djoube	loc29
0.899068	f	674.057	5144.74	6.3	nosun	offtrail	mong_3068	mong	3068	ndongo	loc29
0.474123	f	701.864	701.864	13	nosun	ontrail	misa_3151	misa	3151	camp	loc30
0.039615	m	735.902	716.576	28	sun	offtrail	jiji_3069	jiji	3069	camp_ours	loc31
0.0728959	m	735.902	3432.12	28	sun	offtrail	jiji_3069	jiji	3069	djoube	loc31
0.011881	m	735.902	1927.27	28	sun	offtrail	jiji_3069	jiji	3069	monsanda	loc31
0.00633421	m	735.902	5480.59	28	sun	offtrail	jiji_3069	jiji	3069	ndongo	loc31
0.10063	m	735.902	9887.12	28	sun	offtrail	jiji_3069	jiji	3069	bimbamboko	loc31
0.0784427	m	735.902	1213.33	28	sun	offtrail	jiji_3069	jiji	3069	bauler	loc31
0.00633421	m	735.902	71.3654	28	sun	offtrail	jiji_3069	jiji	3069	P20	loc31
0.338047	m	791.795	791.795	11.5	nosun	offtrail	bang_3010	bang	3010	camp	loc32
0.116016	m	791.795	4761.31	11.5	nosun	offtrail	bang_3010	bang	3010	djoube	loc32
0.0626943	m	791.795	4886.09	11.5	nosun	offtrail	bang_3010	bang	3010	ndongo	loc32
0.00633421	f	792.514	804.958	58	sun	offtrail	jama_3051	jama	3051	camp_ours	loc33
0.011881	f	792.514	4749.95	58	sun	offtrail	jama_3051	jama	3051	djoube	loc33
0.150551	f	792.514	14774.7	58	sun	offtrail	jama_3051	jama	3051	banguimotaba	loc33
0.294768	f	792.514	4905.48	58	sun	offtrail	jama_3051	jama	3051	ndongo	loc33
0.10063	m	822.889	803.534	56	nosun	offtrail	boku_2746	boku	2746	camp_ours	loc34
0.150551	m	822.889	851.395	56	nosun	offtrail	boku_2746	boku	2746	camp_kuona	loc34
0.255941	m	822.889	3339.29	56	nosun	offtrail	boku_2746	boku	2746	djoube	loc34
0.0562555	m	822.889	5529.48	56	nosun	offtrail	boku_2746	boku	2746	ndongo	loc34
0.039615	m	822.889	16173.1	56	nosun	offtrail	boku_2746	boku	2746	banguimotaba	loc34
0.914494	f	832.94	832.94	15	nosun	ontrail	dumb_3021	dumb	3021	camp	loc35
0.321997	f	832.94	3328.51	15	nosun	ontrail	dumb_3021	dumb	3021	djoube	loc35
0.914923	f	832.94	5455.93	15	nosun	ontrail	dumb_3021	dumb	3021	ndongo	loc35
0.011881	f	840.65	852.064	43	sun	ontrail	sopo_3051	sopo	3051	camp_ours	loc36
0.0950831	f	840.65	4751.44	43	sun	ontrail	sopo_3051	sopo	3051	djoube	loc36
0.48336	f	840.65	14736.6	43	sun	ontrail	sopo_3051	sopo	3051	banguimotaba	loc36
0.011881	f	840.65	4968.18	43	sun	ontrail	sopo_3051	sopo	3051	ndongo	loc36
0.87944	m	898.814	898.814	11	nosun	offtrail	alin_3024	alin	3024	camp	loc37
0.154765	m	898.814	5044.3	11	nosun	offtrail	alin_3024	alin	3024	djoube	loc37
0.354139	m	898.814	4132.45	11	nosun	offtrail	alin_3024	alin	3024	ndongo	loc37
0.327615	m	938.618	938.618	8	nosun	offtrail	yang_3090	yang	3090	camp	loc38
0.354038	m	938.618	3296.07	8	nosun	offtrail	yang_3090	yang	3090	djoube	loc38
0.81139	m	938.618	5340.77	8	nosun	offtrail	yang_3090	yang	3090	ndongo	loc38
0.0340682	m	939.934	958.677	46	nosun	offtrail	simo_2635	simo	2635	camp_ours	loc39
0.0174278	m	939.934	999.046	46	nosun	offtrail	simo_2635	simo	2635	camp_kuona	loc39
0.011881	m	939.934	5052.4	46	nosun	offtrail	simo_2635	simo	2635	djoube	loc39
0.333596	m	939.934	15080.9	46	nosun	offtrail	simo_2635	simo	2635	banguimotaba	loc39
0.889866	f	972.072	972.072	6.7	nosun	offtrail	mosy_3066	mosy	3066	camp	loc40
0.386098	f	972.072	3266.73	6.7	nosun	offtrail	mosy_3066	mosy	3066	djoube	loc40
0.739453	f	972.072	5358.99	6.7	nosun	offtrail	mosy_3066	mosy	3066	ndongo	loc40
0.773016	f	1000.77	1000.77	15	nosun	ontrail	dumb_3020	dumb	3020	camp	loc41
0.421229	f	1000.77	3172.47	15	nosun	ontrail	dumb_3020	dumb	3020	djoube	loc41
0.91568	f	1000.77	5533.95	15	nosun	ontrail	dumb_3020	dumb	3020	ndongo	loc41
0.194926	m	1013.06	994.636	15.5	nosun	offtrail	djou_2746	djou	2746	camp_ours	loc42
0.0340682	m	1013.06	897.005	15.5	nosun	offtrail	djou_2746	djou	2746	camp_kuona	loc42
0.00633421	m	1013.06	3176.28	15.5	nosun	offtrail	djou_2746	djou	2746	djoube	loc42
0.106177	m	1013.06	5495.71	15.5	nosun	offtrail	djou_2746	djou	2746	ndongo	loc42
0.2393	m	1013.06	16480.1	15.5	nosun	offtrail	djou_2746	djou	2746	banguimotaba	loc42
0.00633421	f	1107.36	1121.27	61	sun	offtrail	bake_3098	bake	3098	camp_ours	loc43
0.039615	f	1107.36	5065.89	61	sun	offtrail	bake_3098	bake	3098	djoube	loc43
0.000787402	f	1107.36	3173.72	61	sun	offtrail	bake_3098	bake	3098	monsanda	loc43
0.00633421	f	1107.36	4841.65	61	sun	offtrail	bake_3098	bake	3098	ndongo	loc43
0.0174278	f	1107.36	9001.64	61	sun	offtrail	bake_3098	bake	3098	bimbamboko	loc43
0.0451619	f	1107.36	2897.39	61	sun	offtrail	bake_3098	bake	3098	bauler	loc43
0.0784427	f	1107.36	1121.27	18	sun	offtrail	dolo_3098	dolo	3098	camp_ours	loc43
0.0950831	f	1107.36	5065.89	18	sun	offtrail	dolo_3098	dolo	3098	djoube	loc43
0.0285214	f	1107.36	3173.72	18	sun	offtrail	dolo_3098	dolo	3098	monsanda	loc43
0.106177	f	1107.36	4841.65	18	sun	offtrail	dolo_3098	dolo	3098	ndongo	loc43
0.0174278	f	1107.36	9001.64	18	sun	offtrail	dolo_3098	dolo	3098	bimbamboko	loc43
0.011881	f	1107.36	2897.39	18	sun	offtrail	dolo_3098	dolo	3098	bauler	loc43
0.0947146	f	1185.1	1185.1	12.7	nosun	offtrail	same_3027	same	3027	camp	loc44
0.0282794	f	1185.1	2992.49	12.7	nosun	offtrail	same_3027	same	3027	djoube	loc44
0.858697	f	1185.1	5875.15	12.7	nosun	offtrail	same_3027	same	3027	ndongo	loc44
0.262776	m	1230.81	1230.81	8	sun	offtrail	yang_3158	yang	3158	camp	loc45
0.106054	m	1230.81	4940.39	8	sun	offtrail	yang_3158	yang	3158	djoube	loc45
0.028191	m	1230.81	4887.68	8	sun	offtrail	yang_3158	yang	3158	ndongo	loc45
0.71402	m	1308.14	1308.14	10.7	nosun	offtrail	mbol_3016	mbol	3016	camp	loc46
0.122563	m	1308.14	5286.26	10.7	nosun	offtrail	mbol_3016	mbol	3016	djoube	loc46
0.466672	m	1308.14	4765.5	10.7	nosun	offtrail	mbol_3016	mbol	3016	ndongo	loc46
0.00633421	m	1335.29	1316.31	42	sun	ontrail	bene_3058	bene	3058	camp_ours	loc47
0.011881	m	1335.29	2833.6	42	sun	ontrail	bene_3058	bene	3058	djoube	loc47
0.0229746	m	1335.29	16707.7	42	sun	ontrail	bene_3058	bene	3058	banguimotaba	loc47
0.011881	m	1335.29	5820.76	42	sun	ontrail	bene_3058	bene	3058	ndongo	loc47
0.00633421	m	1335.29	1693.41	42	sun	ontrail	bene_3058	bene	3058	monsanda	loc47
0.0285214	m	1335.29	10263.4	42	sun	ontrail	bene_3058	bene	3058	bimbamboko	loc47
0.11727	m	1337.46	1318.49	67	nosun	ontrail	bumb_3059	bumb	3059	camp_ours	loc48
0.0673491	m	1337.46	2831.73	67	nosun	ontrail	bumb_3059	bumb	3059	djoube	loc48
0.011881	m	1337.46	5821.3	67	nosun	ontrail	bumb_3059	bumb	3059	ndongo	loc48
0.106177	m	1337.46	1694.01	67	nosun	ontrail	bumb_3059	bumb	3059	monsanda	loc48
0.0285214	m	1337.46	10264.1	67	nosun	ontrail	bumb_3059	bumb	3059	bimbamboko	loc48
0.0784427	m	1337.46	588.785	67	nosun	ontrail	bumb_3059	bumb	3059	bauler	loc48
0.514216	f	1382.71	1382.71	12.7	nosun	ontrail	same_3027	same	3027	camp	loc49
0.352804	f	1382.71	2782.86	12.7	nosun	ontrail	same_3027	same	3027	djoube	loc49
0.471418	f	1382.71	5874.87	12.7	nosun	ontrail	same_3027	same	3027	ndongo	loc49
0.267529	m	1404.18	1404.18	5.5	nosun	offtrail	itat_3084	itat	3084	camp	loc50
0.952957	m	1404.18	4736.42	5.5	nosun	offtrail	itat_3084	itat	3084	djoube	loc50
0.741859	m	1404.18	3726.66	5.5	nosun	offtrail	itat_3084	itat	3084	ndongo	loc50
0.011881	f	1503.24	1417.45	76	sun	offtrail	niel_3143	niel	3143	camp_ours	loc51
0.000787402	f	1503.24	4683.12	76	sun	offtrail	niel_3143	niel	3143	djoube	loc51
0.011881	f	1503.24	3698.36	76	sun	offtrail	niel_3143	niel	3143	monsanda	loc51
0.00633421	f	1503.24	3767.69	76	sun	offtrail	niel_3143	niel	3143	ndongo	loc51
0.0285214	f	1503.24	8218.93	76	sun	offtrail	niel_3143	niel	3143	bimbamboko	loc51
0.000787402	f	1503.24	2562.51	76	sun	offtrail	niel_3143	niel	3143	bauler	loc51
0.0285214	f	1503.24	1320.98	76	sun	offtrail	niel_3143	niel	3143	L30PEMB_c	loc51
0.751299	m	1563.09	1563.09	10.7	nosun	offtrail	mbol_3016	mbol	3016	camp	loc52
0.822381	m	1563.09	5185.71	10.7	nosun	offtrail	mbol_3016	mbol	3016	djoube	loc52
0.739926	m	1563.09	3358.67	10.7	nosun	offtrail	mbol_3016	mbol	3016	ndongo	loc52
0.36133	f	1578.06	1579.49	16.7	sun	ontrail	mole_3089	mole	3089	camp_ours	loc53
0.0340682	f	1578.06	4411.48	16.7	sun	ontrail	mole_3089	mole	3089	djoube	loc53
0.133911	f	1578.06	3616.4	16.7	sun	ontrail	mole_3089	mole	3089	monsanda	loc53
0.00633421	f	1578.06	3983.2	16.7	sun	ontrail	mole_3089	mole	3089	ndongo	loc53
0.011881	f	1578.06	8438.8	16.7	sun	ontrail	mole_3089	mole	3089	bimbamboko	loc53
0.011881	f	1578.06	2375.81	16.7	sun	ontrail	mole_3089	mole	3089	bauler	loc53
0.128364	f	1578.06	720.928	16.7	sun	ontrail	mole_3089	mole	3089	P41	loc53
0.0285214	f	1578.06	1579.49	23	sun	ontrail	ndon_3089	ndon	3089	camp_ours	loc53
0.0340682	f	1578.06	4411.48	23	sun	ontrail	ndon_3089	ndon	3089	djoube	loc53
0.0895363	f	1578.06	3616.4	23	sun	ontrail	ndon_3089	ndon	3089	monsanda	loc53
0.0507087	f	1578.06	3983.2	23	sun	ontrail	ndon_3089	ndon	3089	ndongo	loc53
0.011881	f	1578.06	8438.8	23	sun	ontrail	ndon_3089	ndon	3089	bimbamboko	loc53
0.011881	f	1578.06	2375.81	23	sun	ontrail	ndon_3089	ndon	3089	bauler	loc53
0.0174278	f	1578.06	720.928	23	sun	ontrail	ndon_3089	ndon	3089	P41	loc53
0.201334	m	1689.78	1689.78	8.5	nosun	offtrail	anic_3143	anic	3143	camp	loc54
0.60025	m	1689.78	5103.12	8.5	nosun	offtrail	anic_3143	anic	3143	djoube	loc54
0.954294	m	1689.78	3424.38	8.5	nosun	offtrail	anic_3143	anic	3143	ndongo	loc54
0.400791	m	1910.67	1910.67	6.4	nosun	offtrail	malo_3129	malo	3129	camp	loc55
0.996844	m	1910.67	5141.16	6.4	nosun	offtrail	malo_3129	malo	3129	djoube	loc55
0.441596	m	1910.67	3296.18	6.4	nosun	offtrail	malo_3129	malo	3129	ndongo	loc55
0.411251	m	1916.13	1790.39	71	sun	offtrail	boke_3150	boke	3150	camp_ours	loc56
0.111724	m	1916.13	5138.13	71	sun	offtrail	boke_3150	boke	3150	djoube	loc56
0.111724	m	1916.13	4159.5	71	sun	offtrail	boke_3150	boke	3150	monsanda	loc56
0.433438	m	1916.13	16093.5	71	sun	offtrail	boke_3150	boke	3150	banguimotaba	loc56
0.0285214	m	1916.13	3296.42	71	sun	offtrail	boke_3150	boke	3150	ndongo	loc56
0.0285214	m	1916.13	7748.53	71	sun	offtrail	boke_3150	boke	3150	bimbamboko	loc56
0.039615	m	1916.13	3033.12	71	sun	offtrail	boke_3150	boke	3150	bauler	loc56
0.0269797	f	2046.76	2046.76	6.6	nosun	offtrail	kumu_3032	kumu	3032	camp	loc57
0.768665	f	2046.76	2419.97	6.6	nosun	offtrail	kumu_3032	kumu	3032	djoube	loc57
0.964307	f	2046.76	5973.55	6.6	nosun	offtrail	kumu_3032	kumu	3032	ndongo	loc57
0.310791	m	2049.9	2049.9	13.5	nosun	ontrail	kuon_3001	kuon	3001	camp	loc58
0.0972138	m	2049.9	2205.22	13.5	nosun	ontrail	kuon_3001	kuon	3001	djoube	loc58
0.87345	m	2049.9	6706.55	13.5	nosun	ontrail	kuon_3001	kuon	3001	ndongo	loc58
0.200472	f	2611.62	2630.41	33	sun	ontrail	apel_3079	apel	3079	camp_ours	loc59
0.0451619	f	2611.62	6679.64	33	sun	ontrail	apel_3079	apel	3079	djoube	loc59
0.267034	f	2611.62	14315	33	sun	ontrail	apel_3079	apel	3079	banguimotaba	loc59
0.0618023	f	2611.62	5187.56	33	sun	ontrail	apel_3079	apel	3079	monsanda	loc59
0.0507087	f	2611.62	2696.08	33	sun	ontrail	apel_3079	apel	3079	ndongo	loc59
0.039615	f	2611.62	6763.59	33	sun	ontrail	apel_3079	apel	3079	bimbamboko	loc59
0.0340682	f	2611.62	4445.59	33	sun	ontrail	apel_3079	apel	3079	bauler	loc59
0.156098	f	2611.62	1446.04	33	sun	ontrail	apel_3079	apel	3079	P32GEMB	loc59
0.0895363	f	2611.62	2630.41	37	sun	ontrail	bote_3079	bote	3079	camp_ours	loc59
0.0673491	f	2611.62	6679.64	37	sun	ontrail	bote_3079	bote	3079	djoube	loc59
0.156098	f	2611.62	14315	37	sun	ontrail	bote_3079	bote	3079	banguimotaba	loc59
0.228206	f	2611.62	5187.56	37	sun	ontrail	bote_3079	bote	3079	monsanda	loc59
0.161645	f	2611.62	2696.08	37	sun	ontrail	bote_3079	bote	3079	ndongo	loc59
0.039615	f	2611.62	6763.59	37	sun	ontrail	bote_3079	bote	3079	bimbamboko	loc59
0.133911	f	2611.62	4445.59	37	sun	ontrail	bote_3079	bote	3079	bauler	loc59
0.156098	f	2611.62	1446.04	37	sun	ontrail	bote_3079	bote	3079	P32GEMB	loc59
0.0895363	f	2611.62	2630.41	28	sun	ontrail	jaba_3079	jaba	3079	camp_ours	loc59
0.011881	f	2611.62	6679.64	28	sun	ontrail	jaba_3079	jaba	3079	djoube	loc59
0.11727	f	2611.62	5187.56	28	sun	ontrail	jaba_3079	jaba	3079	monsanda	loc59
0.217113	f	2611.62	2696.08	28	sun	ontrail	jaba_3079	jaba	3079	ndongo	loc59
0.350236	f	2611.62	6763.59	28	sun	ontrail	jaba_3079	jaba	3079	bimbamboko	loc59
0.0340682	f	2611.62	4445.59	28	sun	ontrail	jaba_3079	jaba	3079	bauler	loc59
0.211566	f	2611.62	1446.04	28	sun	ontrail	jaba_3079	jaba	3079	P32GEMB	loc59
0.00633421	m	2615.39	2596.15	28	sun	offtrail	jiji_3092	jiji	3092	camp_ours	loc60
0.0174278	m	2615.39	1543.92	28	sun	offtrail	jiji_3092	jiji	3092	djoube	loc60
0.0174278	m	2615.39	1363.65	28	sun	offtrail	jiji_3092	jiji	3092	monsanda	loc60
0.0174278	m	2615.39	6976.79	28	sun	offtrail	jiji_3092	jiji	3092	ndongo	loc60
0.0174278	m	2615.39	11432.6	28	sun	offtrail	jiji_3092	jiji	3092	bimbamboko	loc60
0.00633421	m	2615.39	701.22	28	sun	offtrail	jiji_3092	jiji	3092	bauler	loc60
0.0285214	f	2781.25	2799.92	15.5	sun	offtrail	emil_3079	emil	3079	camp_ours	loc61
0.0728959	f	2781.25	6832.41	15.5	sun	offtrail	emil_3079	emil	3079	djoube	loc61
0.0562555	f	2781.25	5361.69	15.5	sun	offtrail	emil_3079	emil	3079	monsanda	loc61
0.0950831	f	2781.25	2535.63	15.5	sun	offtrail	emil_3079	emil	3079	ndongo	loc61
0.0174278	f	2781.25	6582.97	15.5	sun	offtrail	emil_3079	emil	3079	bimbamboko	loc61
0.0895363	f	2781.25	4602.1	15.5	sun	offtrail	emil_3079	emil	3079	bauler	loc61
0.128364	f	2781.25	1583.46	15.5	sun	offtrail	emil_3079	emil	3079	P32GEMB	loc61
0.122817	f	2781.25	185.785	15.5	sun	offtrail	emil_3079	emil	3079	P08PUSA	loc61
0.194926	f	2781.25	2799.92	16.7	sun	offtrail	ingo_3079	ingo	3079	camp_ours	loc61
0.0728959	f	2781.25	6832.41	16.7	sun	offtrail	ingo_3079	ingo	3079	djoube	loc61
0.000787402	f	2781.25	5361.69	16.7	sun	offtrail	ingo_3079	ingo	3079	monsanda	loc61
0.183832	f	2781.25	2535.63	16.7	sun	offtrail	ingo_3079	ingo	3079	ndongo	loc61
0.0950831	f	2781.25	6582.97	16.7	sun	offtrail	ingo_3079	ingo	3079	bimbamboko	loc61
0.200472	f	2781.25	4602.1	16.7	sun	offtrail	ingo_3079	ingo	3079	bauler	loc61
0.0950831	f	2781.25	1583.46	16.7	sun	offtrail	ingo_3079	ingo	3079	P32GEMB	loc61
0.10063	f	2781.25	185.785	16.7	sun	offtrail	ingo_3079	ingo	3079	P08PUSA	loc61
0.011881	m	2893.85	2894.07	65	sun	offtrail	bobi_3084	bobi	3084	camp_ours	loc62
0.011881	m	2893.85	5298.17	65	sun	offtrail	bobi_3084	bobi	3084	djoube	loc62
0.0285214	m	2893.85	13722.6	65	sun	offtrail	bobi_3084	bobi	3084	banguimotaba	loc62
0.0340682	m	2893.85	3013.75	65	sun	offtrail	bobi_3084	bobi	3084	monsanda	loc62
0.0174278	m	2893.85	7012.13	65	sun	offtrail	bobi_3084	bobi	3084	ndongo	loc62
0.0229746	m	2893.85	10964.4	65	sun	offtrail	bobi_3084	bobi	3084	bimbamboko	loc62
0.178285	m	2893.85	3728.42	65	sun	offtrail	bobi_3084	bobi	3084	bauler	loc62
0.011881	f	2893.85	2894.07	69	sun	offtrail	buma_3084	buma	3084	camp_ours	loc62
0.011881	f	2893.85	5298.17	69	sun	offtrail	buma_3084	buma	3084	djoube	loc62
0.0340682	f	2893.85	3013.75	69	sun	offtrail	buma_3084	buma	3084	monsanda	loc62
0.0174278	f	2893.85	7012.13	69	sun	offtrail	buma_3084	buma	3084	ndongo	loc62
0.0229746	f	2893.85	10964.4	69	sun	offtrail	buma_3084	buma	3084	bimbamboko	loc62
0.0673491	f	2893.85	3728.42	69	sun	offtrail	buma_3084	buma	3084	bauler	loc62
0.178285	f	2893.85	2894.07	15	sun	offtrail	dumb_3084	dumb	3084	camp_ours	loc62
0.289221	f	2893.85	5298.17	15	sun	offtrail	dumb_3084	dumb	3084	djoube	loc62
0.189379	f	2893.85	3013.75	15	sun	offtrail	dumb_3084	dumb	3084	monsanda	loc62
0.150551	f	2893.85	7012.13	15	sun	offtrail	dumb_3084	dumb	3084	ndongo	loc62
0.189379	f	2893.85	10964.4	15	sun	offtrail	dumb_3084	dumb	3084	bimbamboko	loc62
0.344689	f	2893.85	3728.42	15	sun	offtrail	dumb_3084	dumb	3084	bauler	loc62
0.011881	f	2893.85	2894.07	14	sun	offtrail	hana_3084	hana	3084	camp_ours	loc62
0.011881	f	2893.85	5298.17	14	sun	offtrail	hana_3084	hana	3084	djoube	loc62
0.0340682	f	2893.85	3013.75	14	sun	offtrail	hana_3084	hana	3084	monsanda	loc62
0.0174278	f	2893.85	7012.13	14	sun	offtrail	hana_3084	hana	3084	ndongo	loc62
0.00633421	f	2893.85	10964.4	14	sun	offtrail	hana_3084	hana	3084	bimbamboko	loc62
0.011881	f	2893.85	3728.42	14	sun	offtrail	hana_3084	hana	3084	bauler	loc62
0.011881	f	2893.85	2894.07	58	sun	offtrail	jama_3084	jama	3084	camp_ours	loc62
0.011881	f	2893.85	5298.17	58	sun	offtrail	jama_3084	jama	3084	djoube	loc62
0.0285214	f	2893.85	13722.6	58	sun	offtrail	jama_3084	jama	3084	banguimotaba	loc62
0.0229746	f	2893.85	3013.75	58	sun	offtrail	jama_3084	jama	3084	monsanda	loc62
0.0174278	f	2893.85	7012.13	58	sun	offtrail	jama_3084	jama	3084	ndongo	loc62
0.0229746	f	2893.85	10964.4	58	sun	offtrail	jama_3084	jama	3084	bimbamboko	loc62
0.011881	f	2893.85	3728.42	58	sun	offtrail	jama_3084	jama	3084	bauler	loc62
0.011881	m	2893.85	2894.07	17	sun	offtrail	jamb_3084	jamb	3084	camp_ours	loc62
0.178285	m	2893.85	5298.17	17	sun	offtrail	jamb_3084	jamb	3084	djoube	loc62
0.305862	m	2893.85	13722.6	17	sun	offtrail	jamb_3084	jamb	3084	banguimotaba	loc62
0.133911	m	2893.85	3013.75	17	sun	offtrail	jamb_3084	jamb	3084	monsanda	loc62
0.039615	m	2893.85	7012.13	17	sun	offtrail	jamb_3084	jamb	3084	ndongo	loc62
0.0507087	m	2893.85	10964.4	17	sun	offtrail	jamb_3084	jamb	3084	bimbamboko	loc62
0.289221	m	2893.85	3728.42	17	sun	offtrail	jamb_3084	jamb	3084	bauler	loc62
0.011881	m	2893.85	2894.07	24	sun	offtrail	jino_3084	jino	3084	camp_ours	loc62
0.0673491	m	2893.85	5298.17	24	sun	offtrail	jino_3084	jino	3084	djoube	loc62
0.0839895	m	2893.85	13722.6	24	sun	offtrail	jino_3084	jino	3084	banguimotaba	loc62
0.0229746	m	2893.85	3013.75	24	sun	offtrail	jino_3084	jino	3084	monsanda	loc62
0.039615	m	2893.85	7012.13	24	sun	offtrail	jino_3084	jino	3084	ndongo	loc62
0.0229746	m	2893.85	10964.4	24	sun	offtrail	jino_3084	jino	3084	bimbamboko	loc62
0.178285	m	2893.85	3728.42	24	sun	offtrail	jino_3084	jino	3084	bauler	loc62
0.011881	m	2893.85	2894.07	25	sun	offtrail	kumk_3084	kumk	3084	camp_ours	loc62
0.011881	m	2893.85	5298.17	25	sun	offtrail	kumk_3084	kumk	3084	djoube	loc62
0.0285214	m	2893.85	13722.6	25	sun	offtrail	kumk_3084	kumk	3084	banguimotaba	loc62
0.0229746	m	2893.85	3013.75	25	sun	offtrail	kumk_3084	kumk	3084	monsanda	loc62
0.0174278	m	2893.85	7012.13	25	sun	offtrail	kumk_3084	kumk	3084	ndongo	loc62
0.0340682	m	2893.85	10964.4	25	sun	offtrail	kumk_3084	kumk	3084	bimbamboko	loc62
0.011881	m	2893.85	3728.42	25	sun	offtrail	kumk_3084	kumk	3084	bauler	loc62
0.011881	m	2893.85	2894.07	35	sun	offtrail	lune_3084	lune	3084	camp_ours	loc62
0.0451619	m	2893.85	5298.17	35	sun	offtrail	lune_3084	lune	3084	djoube	loc62
0.0839895	m	2893.85	13722.6	35	sun	offtrail	lune_3084	lune	3084	banguimotaba	loc62
0.0229746	m	2893.85	3013.75	35	sun	offtrail	lune_3084	lune	3084	monsanda	loc62
0.0174278	m	2893.85	7012.13	35	sun	offtrail	lune_3084	lune	3084	ndongo	loc62
0.0340682	m	2893.85	10964.4	35	sun	offtrail	lune_3084	lune	3084	bimbamboko	loc62
0.122817	m	2893.85	3728.42	35	sun	offtrail	lune_3084	lune	3084	bauler	loc62
0.011881	m	2893.85	2894.07	26	sun	offtrail	mise_3084	mise	3084	camp_ours	loc62
0.011881	m	2893.85	5298.17	26	sun	offtrail	mise_3084	mise	3084	djoube	loc62
0.0839895	m	2893.85	13722.6	26	sun	offtrail	mise_3084	mise	3084	banguimotaba	loc62
0.0229746	m	2893.85	3013.75	26	sun	offtrail	mise_3084	mise	3084	monsanda	loc62
0.0174278	m	2893.85	7012.13	26	sun	offtrail	mise_3084	mise	3084	ndongo	loc62
0.0229746	m	2893.85	10964.4	26	sun	offtrail	mise_3084	mise	3084	bimbamboko	loc62
0.011881	m	2893.85	3728.42	26	sun	offtrail	mise_3084	mise	3084	bauler	loc62
0.011881	f	2893.85	2894.07	26.5	sun	offtrail	niey_3084	niey	3084	camp_ours	loc62
0.0673491	f	2893.85	5298.17	26.5	sun	offtrail	niey_3084	niey	3084	djoube	loc62
0.0285214	f	2893.85	13722.6	26.5	sun	offtrail	niey_3084	niey	3084	banguimotaba	loc62
0.00633421	f	2893.85	3013.75	26.5	sun	offtrail	niey_3084	niey	3084	monsanda	loc62
0.0174278	f	2893.85	7012.13	26.5	sun	offtrail	niey_3084	niey	3084	ndongo	loc62
0.00633421	f	2893.85	10964.4	26.5	sun	offtrail	niey_3084	niey	3084	bimbamboko	loc62
0.0451619	f	2893.85	3728.42	26.5	sun	offtrail	niey_3084	niey	3084	bauler	loc62
0.0673491	m	2893.85	2894.07	46	sun	offtrail	simo_3084	simo	3084	camp_ours	loc62
0.178285	m	2893.85	5298.17	46	sun	offtrail	simo_3084	simo	3084	djoube	loc62
0.194926	m	2893.85	13722.6	46	sun	offtrail	simo_3084	simo	3084	banguimotaba	loc62
0.133911	m	2893.85	3013.75	46	sun	offtrail	simo_3084	simo	3084	monsanda	loc62
0.0728959	m	2893.85	7012.13	46	sun	offtrail	simo_3084	simo	3084	ndongo	loc62
0.0340682	m	2893.85	10964.4	46	sun	offtrail	simo_3084	simo	3084	bimbamboko	loc62
0.178285	m	2893.85	3728.42	46	sun	offtrail	simo_3084	simo	3084	bauler	loc62
0.011881	f	2893.85	2894.07	22	sun	offtrail	song_3084	song	3084	camp_ours	loc62
0.122817	f	2893.85	5298.17	22	sun	offtrail	song_3084	song	3084	djoube	loc62
0.139458	f	2893.85	13722.6	22	sun	offtrail	song_3084	song	3084	banguimotaba	loc62
0.0229746	f	2893.85	3013.75	22	sun	offtrail	song_3084	song	3084	monsanda	loc62
0.0174278	f	2893.85	7012.13	22	sun	offtrail	song_3084	song	3084	ndongo	loc62
0.00633421	f	2893.85	10964.4	22	sun	offtrail	song_3084	song	3084	bimbamboko	loc62
0.178285	f	2893.85	3728.42	22	sun	offtrail	song_3084	song	3084	bauler	loc62
0.011881	f	3235.8	3250.14	14.5	sun	offtrail	mado_3054	mado	3054	camp_ours	loc63
0.0839895	f	3235.8	6776.44	14.5	sun	offtrail	mado_3054	mado	3054	djoube	loc63
0.0285214	f	3235.8	15643.3	14.5	sun	offtrail	mado_3054	mado	3054	banguimotaba	loc63
0.000787402	f	3235.8	1651.24	14.5	sun	offtrail	mado_3054	mado	3054	ndongo	loc63
0.311409	f	3235.8	5759.9	14.5	sun	offtrail	mado_3054	mado	3054	monsanda	loc63
0.011881	f	3235.8	3250.14	26.5	sun	offtrail	niey_3054	niey	3054	camp_ours	loc63
0.000787402	f	3235.8	6776.44	26.5	sun	offtrail	niey_3054	niey	3054	djoube	loc63
0.305862	f	3235.8	15643.3	26.5	sun	offtrail	niey_3054	niey	3054	banguimotaba	loc63
0.0562555	f	3235.8	1651.24	26.5	sun	offtrail	niey_3054	niey	3054	ndongo	loc63
0.311409	f	3235.8	5759.9	26.5	sun	offtrail	niey_3054	niey	3054	monsanda	loc63
0.039615	m	5777.45	5793.99	35	nosun	offtrail	lune_2636	lune	2636	camp_ours	loc64
0.0784427	m	5777.45	9446.26	35	nosun	offtrail	lune_2636	lune	2636	djoube	loc64
0.0728959	m	5777.45	15088.7	35	nosun	offtrail	lune_2636	lune	2636	banguimotaba	loc64
0.0950831	m	5785.93	5802.43	42	nosun	offtrail	bene_2636	bene	2636	camp_ours	loc65
0.0174278	m	5785.93	9448.7	42	nosun	offtrail	bene_2636	bene	2636	djoube	loc65
0.0174278	m	5785.93	15111.3	42	nosun	offtrail	bene_2636	bene	2636	banguimotaba	loc65
